# Supplementary material
Source: publisher figshare collection journal article supplement (https://asha.figshare.com/articles/dataset/_/6170183)
Supplement: Supplementary file 1 [file 1]

**Supplemental Table S3.** Speech perception scores (% correct) for each listening condition.

|                    | Children with cochlear implants |           |           |           |            |            |            |            | Students with typical hearing |           |          |           |           |           |            |            |
|--------------------|---------------------------------|-----------|-----------|-----------|------------|------------|------------|------------|-------------------------------|-----------|----------|-----------|-----------|-----------|------------|------------|
|                    | SNR                             |           |           |           |            |            |            |            | SNR                           |           |          |           |           |           |            |            |
|                    | <u>0</u>                        | <u>+3</u> | <u>+6</u> | <u>+9</u> | <u>+12</u> | <u>+15</u> | <u>+18</u> | <u>+21</u> | <u>-6</u>                     | <u>-3</u> | <u>0</u> | <u>+3</u> | <u>+6</u> | <u>+9</u> | <u>+12</u> | <u>+15</u> |
| <u>0.3 s RT</u>    |                                 |           |           |           |            |            |            |            |                               |           |          |           |           |           |            |            |
| <i>M</i>           | 14.8                            | 16.8      | 41.3      | 56.9      | 70.8       | 76.4       | 77.0       | 89.2       | 27.4                          | 45.8      | 79.1     | 87.1      | 94.6      | 99.0      | 98.7       | 98.6       |
| <i>SD</i>          | 19.6                            | 13.7      | 21.7      | 22.5      | 15.2       | 13.5       | 16.1       | 9.8        | 19.6                          | 25.6      | 24.3     | 14.7      | 14.4      | 2.7       | 2.5        | 3.1        |
| <i>N</i>           | 12                              | 22        | 23        | 23        | 23         | 23         | 23         | 22         | 20                            | 23        | 23       | 23        | 23        | 23        | 18         | 10         |
| <u>0.6 s RT</u>    |                                 |           |           |           |            |            |            |            |                               |           |          |           |           |           |            |            |
| <i>M</i>           | 7.3                             | 18.0      | 33.1      | 58.7      | 67.3       | 68.5       | 71.9       | 80.2       | 24.6                          | 49.9      | 73.3     | 90.1      | 94.9      | 97.3      | 96.9       | 99.0       |
| <i>SD</i>          | 5.8                             | 11.5      | 21.3      | 17.9      | 19.0       | 19.8       | 17.1       | 17.3       | 15.5                          | 24.9      | 24.0     | 14.2      | 6.5       | 7.2       | 6.6        | 2.6        |
| <i>N</i>           | 14                              | 21        | 23        | 23        | 23         | 23         | 22         | 21         | 20                            | 23        | 23       | 23        | 23        | 23        | 16         | 12         |
| <u>0.9 s RT</u>    |                                 |           |           |           |            |            |            |            |                               |           |          |           |           |           |            |            |
| <i>M</i>           | 7.1                             | 13.1      | 26.6      | 40.5      | 56.0       | 59.8       | 61.0       | 64.0       | 12.7                          | 38.7      | 57.1     | 80.5      | 90.3      | 96.4      | 97.9       | 97.7       |
| <i>SD</i>          | 10.3                            | 12.0      | 17.2      | 22.4      | 18.7       | 17.7       | 16.7       | 15.6       | 10.9                          | 27.0      | 26.1     | 18.6      | 12.0      | 7.6       | 4.2        | 3.7        |
| <i>N</i>           | 11                              | 18        | 22        | 23        | 23         | 23         | 23         | 22         | 18                            | 23        | 23       | 23        | 23        | 23        | 23         | 11         |
| <u>Sound Booth</u> |                                 |           |           |           |            |            |            |            |                               |           |          |           |           |           |            |            |
| <i>M</i>           | 18.2                            | 38.1      | 50.0      | 72.8      | 80.4       | 86.3       | 90.4       | 91.3       | 16.6                          | 35.4      | 60.3     | 85.6      | 91.9      | 95.3      | 99.2       | 99.5       |
| <i>SD</i>          | 17.7                            | 22.7      | 22.1      | 21.9      | 18.7       | 14.2       | 9.8        | 8.3        | 17.5                          | 29.2      | 27.8     | 19.2      | 13.1      | 6.9       | 2.6        | 1.4        |
| <i>n</i>           | 9                               | 11        | 14        | 14        | 14         | 14         | 14         | 13         | 5                             | 8         | 10       | 10        | 10        | 10        | 10         | 9          |

*Note.* SNR = speech-to-noise ratio (dBA); RT = reverberation time(s); *M* = mean speech perception score as percent correct; *SD* = standard deviation; *N* and *n* = number of participants. *N* and *n* varied as a result of adjustments in the 21-dB range of test SNRs to each participant's ability to perceive speech-in-noise.
