# Supplementary material
Source: publisher figshare collection journal article supplement (https://asha.figshare.com/articles/dataset/_/6170183)
Supplement: Supplementary file 2 [file 1]

**Supplemental Table S2.** Speech-to-noise ratios for 50% correct perception of speech (SNR-50) by reverberation time.

| Children with cochlear implants |            |            |            |           | Children with typical hearing |            |            |           |  |
|---------------------------------|------------|------------|------------|-----------|-------------------------------|------------|------------|-----------|--|
| RT                              |            |            |            |           | RT                            |            |            |           |  |
|                                 | <u>0.3</u> | <u>0.6</u> | <u>0.9</u> | <u>SB</u> | <u>0.3</u>                    | <u>0.6</u> | <u>0.9</u> | <u>SB</u> |  |
| <i>M</i>                        | 9.7        | 10.9       | 14.0       |           | -2.5                          | -2.3       | -0.6       |           |  |
|                                 | (9.6)      | (10.7)     | (13.4)     | (7.4)     | (-1.2)                        | (-1.5)     | (0.6)      | (-0.5)    |  |
| <i>SD</i>                       | 2.6        | 3.4        | 3.6        |           | 2.6                           | 2.4        | 2.7        |           |  |
|                                 | (2.7)      | (3.6)      | (3.6)      | (3.4)     | (3.2)                         | (2.7)      | (3.0)      | (2.7)     |  |
| <i>N</i>                        | 23         | 23         | 23         |           | 23                            | 23         | 23         |           |  |
|                                 | (14)       | (14)       | (14)       | (14)      | (10)                          | (10)       | (10)       | (10)      |  |

*Note.* RT = reverberation time (s); *M* = mean SNR-50 (dBA); *SD* = standard deviation; *N* = number of participants; SB = sound booth with 0.059s RT. Respective values for subgroups tested in both sound booth and classroom are in parentheses.
